# Supplementary material
Source: PubMed Central journal article supplement (PMC1637073)

**A**

TA-2 5- TAGCTCGAGACCTA )  
AGCTCTGGAT )

GC-2 5- TAGCTCGAGACCGC )  
AGCTCTGGCG )

CT-2 5- TAGCTCGGCGTACT )  
AGCCGCATGA )

TA-3 5- TAGCTCGCTATATA )  
AGCGATATAT )

TG-2 5- TAGCTCGTATATTG )  
AGCATATAAC )

**C**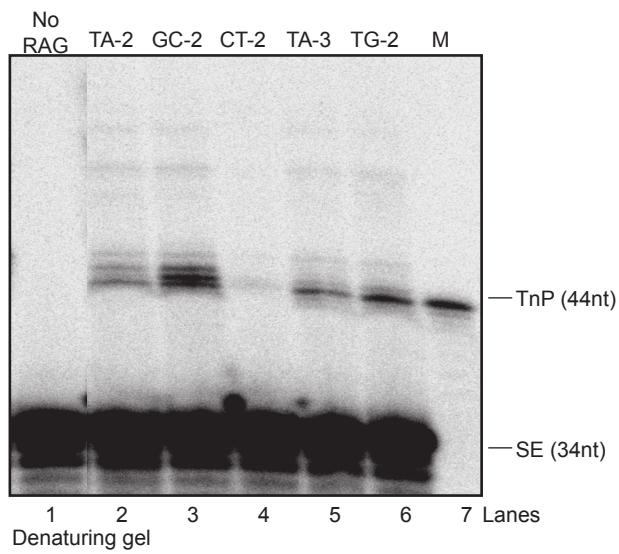**B**

5-CTGGGGCTGCAGnCT )  
GACCCCGACGTCnGA )

5-CTGGGGCTGCAGnGC )  
GACCCCGACGTCnCG )

**D**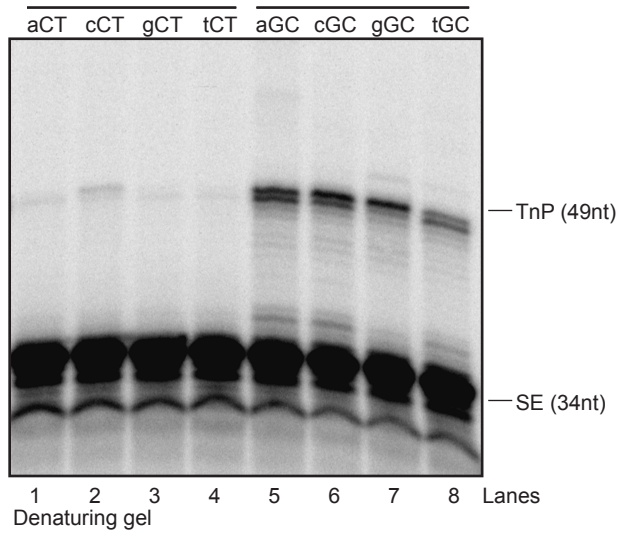

Supplement: pbio.0040350.sg002.pdf [file pbio.0040350.sg002.pdf]
