# Supplementary material
Source: PubMed Central journal article supplement (PMC1637073)

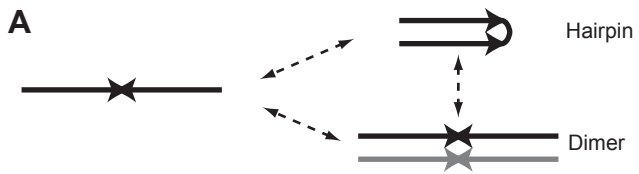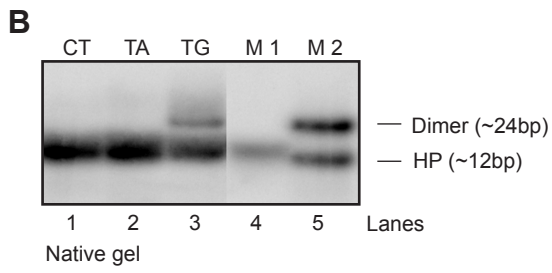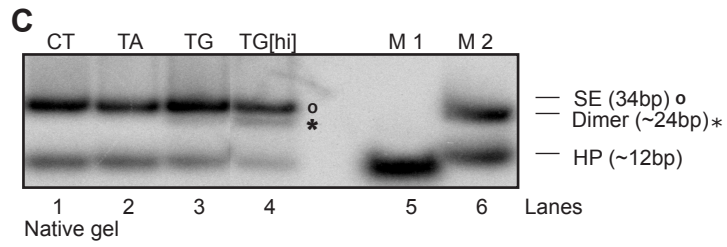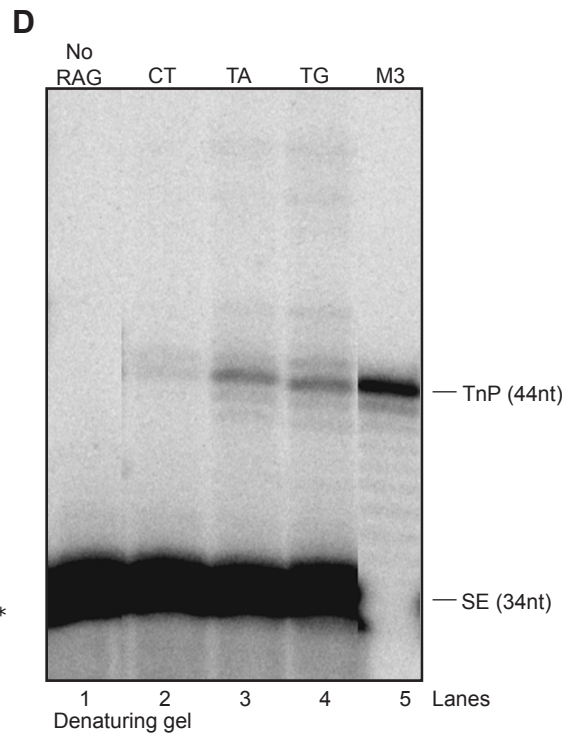

Supplement: pbio.0040350.sg001.pdf [file pbio.0040350.sg001.pdf]

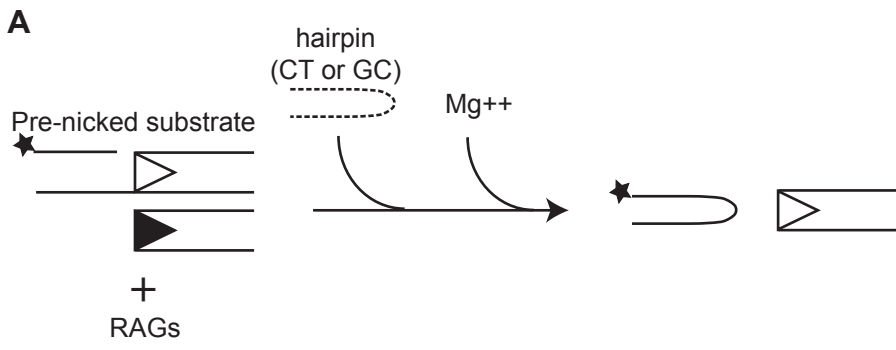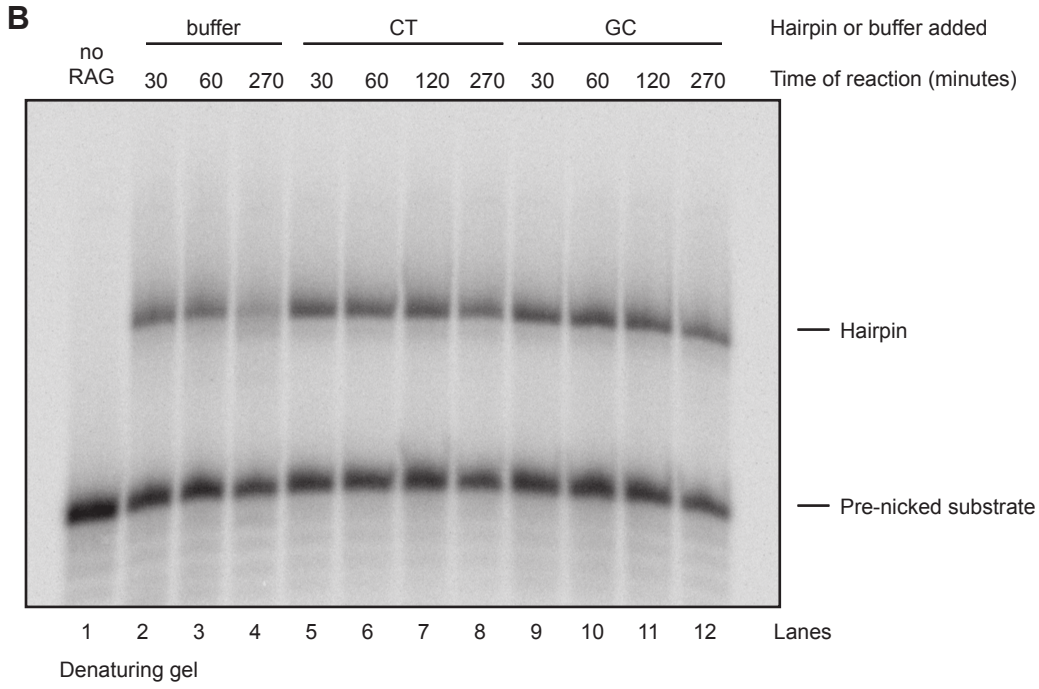

Supplement: pbio.0040350.sg003.pdf [file pbio.0040350.sg003.pdf]
